1 ID JEXBIO/2014/106815

2 **Disruption of insulin signalling affects the neuroendocrine stress reaction in**  
3 ***Drosophila* females**

4 **Rauschenbach I.Yu.<sup>a</sup>, Karpova E.K.<sup>a</sup>, Adonyeva N.V.<sup>a</sup>, Andreenkova O.V.<sup>a</sup>, Faddeeva N.V.<sup>a</sup>,**  
5 **Burdina E.V.<sup>a</sup>, Alekseev A.A.<sup>b</sup>, Menshanov P.N.<sup>a</sup>, Gruntenko N.E.<sup>a\*</sup>**

6 a – Institute of Cytology and Genetics, Siberian Branch of Russian Academy of Sciences,  
7 Novosibirsk 630090, Russia

8 b – Institute of Chemical Kinetics and Combustion, Siberian Branch of Russian Academy of  
9 Sciences, Novosibirsk 630090, Russia

10 **Abstract**

11 Juvenile hormone (JH) and dopamine are involved in the stress response in insects. The  
12 insulin/insulin-like growth factor signalling pathway has also recently been found to be involved  
13 in the regulation of various processes, including stress tolerance. However, the relationships  
14 among the JH, dopamine and insulin signalling pathways remain unclear. Here, we study the role  
15 of insulin signalling in the regulation of JH and dopamine metabolism under normal and heat stress  
16 conditions in *Drosophila melanogaster* females. We show that suppression of the insulin-like  
17 receptor (InR) in the *corpus allatum*, a specialised endocrine gland that synthesises JH, causes an  
18 increase in dopamine level and JH-hydrolysing activity and alters the activities of enzymes that  
19 produce as well as those that degrade dopamine (alkaline phosphatase (ALP), tyrosine hydroxylase  
20 (TH) and dopamine-dependent arylalkylamine N-acetyltransferase (DAT)). We also found that  
21 InR suppression in the *corpus allatum* modulates dopamine, ALP, TH and JH-hydrolysing activity  
22 in response to heat stress and that it decreases the fecundity of the flies. JH application restores  
23 dopamine metabolism and fecundity in females with decreased InR expression in the *corpus*  
24 *allatum*. Our data provide evidence that the insulin/insulin-like growth factor signalling pathway  
25 regulates dopamine metabolism in females of *D. melanogaster* via the system of JH metabolism  
26 and that it affects the development of the neuroendocrine stress reaction and interacts with JH in  
27 the control of reproduction in this species.

28 **Keywords:** *Drosophila*, insulin like receptor, juvenile hormone, dopamine, heat stress

29 \* – Corresponding author: Tel.: 383-3634953; FAX: 383-3331278; *E-mail address:*  
30 *nataly@bionet.nsc.ru* (N.E. Gruntenko)

1

## 1 Introduction

2 It is well known that maintenance of biological organisms under unfavourable conditions  
3 causes the development of non-specific neuroendocrine stress reactions. In insects, the  
4 components of such stress reactions include juvenile hormone (JH) and 20-hydroxyecdysone  
5 (20E), which play a gonadotropic role in adults, and the biogenic amines dopamine (DA),  
6 serotonin and octopamine (OA), which function as neurotransmitters, neuromodulators and  
7 neurohormones (Orchard and Loughton, 1981; Davenport and Evans 1984; Rauschenbach et al.,  
8 1987, 1993, 1995a, 2004; Woodring et al., 1988; Cymborowski, 1991; Hirashima and Eto, 1993;  
9 Neckameyer and Weinstein, 2005; Andersen et al., 2006; Lalouette et al., 2007; Roesijadi et al.,  
10 2007; rev.: Gruntenko and Rauschenbach, 2008).

11 In earlier work, we characterised the development of the neuroendocrine stress reaction in  
12 adults of *Drosophila virilis* and *Drosophila melanogaster*. In these species, DA content increases  
13 sharply as early as 15 min after the beginning of stress exposure (38°C) (Rauschenbach et al.,  
14 1993; Hirashima et al., 2000b; Gruntenko et al., 2004). The increase in DA content is followed by  
15 a sharp decrease in the activity of the key enzyme of its synthesis, tyrosine hydroxylase (TH), and  
16 this decrease continues for up to 60 min after the onset of stress exposure (Rauschenbach et al.,  
17 1995b). A similar pattern is observed with the OA system, the only difference being that the  
18 decrease in activity of tyrosine decarboxylase, the first enzyme involved in OA synthesis,  
19 continues for up to 240 min of the stress exposure (Sukhanova et al., 1997; Hirashima et al.,  
20 2000b). The activity of alkaline phosphatase (ALP, the enzyme that regulates the pool of the DA  
21 and OA precursor tyrosine (rev.: Wright, 1987)) also decreases abruptly under stress conditions  
22 (Sukhanova et al., 1996). The JH metabolic system responds to heat stress by decreasing JH  
23 degradation (Rauschenbach et al., 1995a, 2004; Gruntenko et al., 2000, 2003b). The ecdysteroid  
24 system of wild-type flies responds to a 60-min heat stress by an increase in 20E levels, and this  
25 increase continues for up to 180 min after the onset of stress exposure (Hirashima et al., 2000a;  
26 Gruntenko et al., 2003a).

27 In the last decade, study of the insulin/insulin-like growth factor signalling pathway (IIS)  
28 has been a focus of special interest for many researchers. In *Drosophila*, this pathway contributes  
29 to the regulation of various functions, including growth, development, reproduction, metabolic  
30 homeostasis, longevity and stress resistance (Tatar et al., 2001, 2003; Clancy et al., 2001; Rulifson  
31 et al., 2002; Belgacem and Martin, 2002, 2006, 2007; Broughton et al., 2005; Shingleton et al.,  
32 2005; Piper et al., 2008; Gulia-Nuss et al., 2011). The *Drosophila* IIS has been shown to include  
33 eight insulin-like peptides as well as DILP1–8, a transcription factor of the Forkhead box class O

1 family (dFOXO), an insulin-like receptor (InR), and the fly orthologue of mammalian insulin  
2 receptor substrates, CHICO (revs: Toivonen and Partridge, 2009; Kannan and Fridell, 2013).

3 The existing data suggest that interactions occur between 20E, JH and IIS components.,  
4 InR expression has been demonstrated in the *corpus allatum* (CA), a JH-producing gland  
5 (Belgacem and Martin. 2006, 2007). A mutation in the gene *InR* was shown to lead to a decrease  
6 in 20E and JH production in *Drosophila* adults *in vitro* (Tatar et al., 2001, 2003; Tu et al., 2002,  
7 2005). A mutation of the gene *chico*, when present in the homozygous state, results in an increase  
8 in the titre of ecdysteroids in the haemolymph of 4-day-old *D. melanogaster* females when  
9 normalised with respect to body size (Richard et al., 2005). Ecdysone was found to counteract the  
10 growth-promoting action of IIS (Colombani et al., 2005).

11 Considering the above, we suggest that IIS could be one of the components of the  
12 neuroendocrine stress reaction in *Drosophila* and that it could affect the development of this  
13 reaction. To verify this suggestion, we studied the effects of decreased expression of the *InR* gene  
14 in the CA on fecundity and on DA and JH metabolism under normal and heat stress conditions in  
15 females of *Drosophila*.

## 16 Results

### 17 *InR* expression is decreased in the corpus allatum of *Aug21-Gal4/p[UAS-RNAi-InR]* females

18 We previously demonstrated specific expression of an *Aug21-Gal4* driver in CA of *D.*  
19 *melanogaster* adults (Gruntenko et al., 2012b). Here, we used its recombination with *P{UASp-*  
20 *Act5C.mRFP}* to enable visualisation of CA and then crossed *Aug21-Gal4; UAS-RFP* flies with a  
21 *p[UAS-RNAi-InR]/CyO::arm-GFP* strain carrying the *pUAS-RNAi-InR* interference transgene to  
22 downregulate InR expression in the gland. Fig. 1 shows the results of an immunohistochemical  
23 assay of CA of 1-day-old *Aug21-Gal4/p[UAS-RNAi-InR];UAS-RFP* and *Aug21-Gal4;UAS-RFP*  
24 females using anti-InR antibodies. InR immunoreactivity (green fluorescence) is readily detectable  
25 in CA cells of control *Aug21-Gal4;UAS-RFP* females (Fig. 1a,a<sub>1</sub>). In contrast, reduced InR  
26 immunoreactivity is observed in the CA of *Aug21-Gal4/p[UAS-RNAi-InR];UAS-RFP* females  
27 (Fig. 1b,b<sub>1</sub>).

28 Note that 1-day-old *Aug21-Gal4/p[UAS-RNAi-InR]* females are smaller (Fig. 1c) and have  
29 lower body weights (Fig. 1d) than control *p[UAS-RNAi-InR]/CyO::arm-GFP* females (differences  
30 are significant at  $p < 0.001$ ).

1 ***Decreased expression of InR in CA results in an increase in JH degradation and an increase in***  
 2 ***the response of the JH degradation system to heat stress***

3 We studied the effect of decreased InR expression in CA cells on JH metabolism under  
 4 normal and heat stress conditions in 1-day-old *Aug21-Gal4/p[UAS-RNAi-InR]* (InR-) females  
 5 compared with control *p[UAS-RNAi-InR]/CyO::arm-GFP* females (InR+(1)) as well as with  
 6 females of the parental strains *p[UAS-RNAi-InR]/CyO* (InR+(2)) and *Aug21-Gal4/CyO::arm-GFP*  
 7 (InR+(3)). The results are shown in Fig. 2A. In females that downregulate InR in CA (*i.e.*, *Aug21-*  
 8 *Gal4/p[UAS-RNAi-InR]*), JH degradation levels were significantly higher than in the controls.  
 9 Comparison of InR downregulation and heat stress effects on the JH degradation level by two-way  
 10 ANOVA with genotype and temperature as fixed factors revealed significant effects of genotype  
 11 ( $F_{(3, 217)}=33.79$ ,  $p < 0.00001$ ) and heat stress ( $F_{(1, 62)}=133.66$ ,  $p < 0.00001$ ). A significant interaction  
 12 of these factors ( $F_{(3, 217)}=7.75$ ,  $p < 0.0001$ ) was also found. No significant differences in JH  
 13 degradation were found in any of the control groups (*p[UAS-RNAi-InR]/CyO::arm-GFP*, *p[UAS-*  
 14 *RNAi-InR]/CyO* and *Aug21-Gal4/CyO::arm-GFP*) (Fig. 2A).

15 To assess the effect of InR downregulation in CA on the response of the JH metabolic  
 16 system to stress, we calculated the stress reactivity of the JH degradation system (percentage  
 17 decrease in JH degradation level following heat stress relative to its value under normal conditions)  
 18 in all of the studied groups. The control groups did not differ in JH stress reactivity ( $17 \pm 2$  for  
 19 *p[UAS-RNAi-InR]/CyO::arm-GFP*,  $15 \pm 1$  for *p[UAS-RNAi-InR]/CyO* and  $15 \pm 1$  for  
 20 *Aug21-Gal4/CyO::arm-GFP*). In contrast, an increase in JH stress reactivity was observed in  
 21 *Aug21-Gal4/p[UAS-RNAi-InR]* females ( $26 \pm 1$ ) vs. controls (one-way ANOVA:  $F_{(3, 110)}=13.37$ ,  
 22  $p < 0.00001$  with respect to JH stress reactivity).

23 ***JH treatment rescues JH degradation and JH stress reactivity in Aug21-Gal4/p[UAS-RNAi-***  
 24 ***InR] females***

25 In previous work, we showed that the rate of JH degradation is an indicator of the level of  
 26 hormone production: a decrease in juvenile hormone synthesis leads to an increase in its  
 27 degradation and in the stress reactivity of the JH degrading system (Gruntenko et al., 2010). To  
 28 confirm that the changes in the level of JH-hydrolysing activity and JH stress reactivity found in  
 29 *Aug21-Gal4/p[UAS-RNAi-InR]* females were due to decreased JH production resulting from  
 30 decreased InR expression in CA, we studied the effect of exogenous JH on these parameters. We  
 31 treated 1-day-old *Aug21-Gal4/p[UAS-RNAi-InR]* females with JH dissolved in acetone and  
 32 measured their JH-hydrolysing activity. For comparison, *Aug21-Gal4/p[UAS-RNAi-InR]* and

1 *p[UAS-RNAi-InR]/CyO::arm-GFP* females were treated with acetone. Half of the individuals of  
2 each group under study were exposed to heat stress (Fig. 2B).

3 The results of these experiments show that JH treatment of *Aug21-Gal4/p[UAS-RNAi-InR]*  
4 (InR-) females decreases JH degradation to the level typical of *p[UAS-RNAi-InR]/CyO::arm-GFP*  
5 (InR+(1)) females (Fig. 2B). Comparison of the effects of JH treatment and heat stress on JH  
6 degradation in JH and acetone-treated *Aug21-Gal4/p[UAS-RNAi-InR]* females by two-way  
7 ANOVA with JH treatment and temperature as fixed factors revealed significant effects of JH  
8 treatment ( $F_{(1, 47)}=58.23$ ,  $p < 0.00001$ ) and heat stress ( $F_{(1, 47)}=120.02$ ,  $p < 0.00001$ ). Evidence for  
9 an interaction of these factors was also found ( $F_{(1, 47)}=9.31$ ,  $p = 0.0038$ ). JH stress reactivity in JH-  
10 treated *Aug21-Gal4/p[UAS-RNAi-InR]* females ( $21 \pm 2$ ) also decreased to the level typical of  
11 *p[UAS-RNAi-InR]/CyO::arm-GFP* females ( $21 \pm 2$ ), whereas the stress reactivity of acetone-  
12 treated *Aug21-Gal4/p[UAS-RNAi-InR]* females ( $28 \pm 1$ ) was significantly higher (one-way  
13 ANOVA,  $F_{(1, 24)}=14.30$ ,  $p < 0.001$ ).

14 Note that acetone treatment of the flies does not eliminate differences in JH degradation  
15 levels (Fig. 2B) or JH stress reactivity between *Aug21-Gal4/p[UAS-RNAi-InR]* and *p[UAS-RNAi-*  
16 *InR]/CyO::arm-GFP* females. Both parameters are elevated in females with decreased InR  
17 expression in the CA (*i.e.*, *Aug21-Gal4/p[UAS-RNAi-InR]* females). The comparison of InR  
18 downregulation and heat stress effects on JH degradation levels in acetone-treated females  
19 revealed significant effects of genotype ( $F_{(1, 53)}=92.31$ ,  $p < 0.00001$ ) and heat stress ( $F_{(1, 53)}=170.55$ ,  
20  $p < 0.00001$ ). A significant interaction of these factors ( $F_{(1, 53)}=12.84$ ,  $p < 0.001$ ) was also found.  
21 The differences in stress reactivity between acetone-treated *Aug21-Gal4/p[UAS-RNAi-InR]* and  
22 *p[UAS-RNAi-InR]/CyO::arm-GFP* females are significant (one-way ANOVA,  $F_{(1, 24)}=11.04$ ,  $p =$   
23  $0,0026$ ).

#### 24 ***Decreased expression of InR in the CA results in reduced fecundity of Drosophila females***

25 In previous work, we showed that another indicator of the level of JH production is  
26 fecundity; decreased hormone synthesis due to genetic ablation of a portion of the insect's CA cells  
27 leads to a dramatic decrease in fecundity (Gruntenko et al., 2010). Fig. 3A shows the results of  
28 fecundity evaluation in the *Aug21-Gal4/p[UAS-RNAi-InR]* flies, which exhibits decreased InR  
29 expression in CA, and in *p[UAS-RNAi-InR]/CyO::arm-GFP*, *Aug21-Gal4/CyO::arm-GFP* and  
30 *p[UAS-RNAi-InR]/CyO* flies. Most notably, *Aug21-Gal4/p[UAS-RNAi-InR]* females show  
31 dramatically decreased fecundity. The comparison of InR downregulation and age effects on  
32 fecundity by two-way mixed design ANOVA (day after eclosion – repeated measures factor;

1 genotype – simple factor) revealed significant effects of genotype ( $F_{(3, 41)}=358.69$ ,  $p < 0.00001$ )  
 2 and age ( $F_{(7, 287)}=274.64$ ,  $p < 0.00001$ ). A significant interaction of these factors in females has  
 3 also been found ( $F_{(21, 287)}=24.34$ ,  $p < 0.00001$ ).

4 To confirm that decreased JH synthesis in females with decreased InR expression in *CA*  
 5 leads to a decrease in fecundity, we treated *Aug21-Gal4/p[UAS-RNAi-InR]* females with JH  
 6 dissolved in acetone and measured their fecundity. For comparison, *Aug21-Gal4/p[UAS-RNAi-*  
 7 *InR]* and *p[UAS-RNAi-InR]/CyO::arm-GFP* females were treated with acetone. The results of this  
 8 experiment are shown in Fig 3B. The increased JH levels in *Aug21-Gal4/p[UAS-RNAi-InR]*  
 9 females significantly increased their fecundity. The comparison of JH and age effects on fecundity  
 10 by two-way mixed design ANOVA (day after eclosion – repeated measures factor; JH treatment –  
 11 simple factor) revealed significant effects of JH ( $F_{(1, 15)}=66.40$ ,  $p < 0.00001$ ) and age  
 12 ( $F_{(4, 60)}=155.91$ ,  $p < 0.00001$ ) on fecundity. A significant interaction of these factors in females  
 13 was also found ( $F_{(4, 60)}=58.41$ ,  $p < 0.00001$ ).

#### 14 ***Decreased expression of InR in CA results in increased DA content and DA stress reactivity and*** 15 ***decreased DA-dependent arylalkylamine N-acetyltransferase activity***

16 To assess the effects of decreased InR expression in *CA* on DA level, we quantified DA  
 17 content in *Aug21-Gal4/p[UAS-RNAi-InR]* (InR-) vs. control (*p[UAS-RNAi-InR]/CyO::arm-GFP*)  
 18 (InR+(1)) flies under normal and heat stress conditions (Fig 4A). *Aug21-Gal4/p[UAS-RNAi-InR]*  
 19 females had significantly higher DA content than control flies. Comparison of InR downregulation  
 20 and heat stress effects on the DA levels in females by two-way ANOVA with genotype and  
 21 temperature as fixed factors revealed significant effects of genotype ( $F_{(1, 42)}=673.73$ ,  $p < 0.00001$ )  
 22 and heat stress ( $F_{(1, 42)}=79.02$ ,  $p < 0.00001$ ) on DA content. A significant interaction of these factors  
 23 ( $F_{(1, 42)}=15.45$ ,  $p < 0.001$ ) was found. The response of DA to stress in females with decreased InR  
 24 expression in *CA* was increased relative to control flies: the differences in DA stress reactivity  
 25 between *Aug21-Gal4/p[UAS-RNAi-InR]* and *p[UAS-RNAi-InR]/CyO::arm-GFP* females ( $26 \pm 2$   
 26 and  $18 \pm 2$ , correspondingly) are significant (one-way ANOVA ( $F_{(1, 21)}=8.14$ ,  $p=0.0096$ )).

27 Earlier (Rauschenbach et al., 2011), we found that in young females of *Drosophila* JH  
 28 controls DA content at the level of amine degradation by regulating the activity of DA-dependent  
 29 arylalkylamine N-acetyltransferase (DAT, the primary enzyme that degrades DA (Wright, 1987)).  
 30 We have also determined that DAT is not a component of the *Drosophila* stress response  
 31 (Rauschenbach et al., 1997). Here, we studied the DAT activity of 1-day-old InR-  
 32 (*Aug21-Gal4/p[UAS-RNAi-InR]*) and InR+(1) (*p[UAS-RNAi-InR]/CyO::arm-GFP*) females

1 under normal conditions. The results are shown in Fig. 4B. The level of DAT activity in  
 2 *Aug21-Gal4/p[UAS-RNAi-InR]* females was significantly lower than that in  
 3 *p[UAS-RNAi-InR]/CyO::arm-GFP* flies (one-way ANOVA ( $F_{(1, 36)}=32.97$ ,  $p < 0.00001$ )).  
 4 Treatment of *Aug21-Gal4/p[UAS-RNAi-InR]* females with exogenous JH (Fig. 4C) showed that  
 5 the decrease in DAT activity is related to the decrease in the endogenous level of the hormone; the  
 6 activity of the enzyme in JH-treated InR- females (*Aug21-Gal4/p[UAS-RNAi-InR]*) is increased to  
 7 the level typical of InR+(1) females (*p[UAS-RNAi-InR]/CyO::arm-GFP*). The differences in DAT  
 8 activity between JH and acetone-treated *Aug21-Gal4/p[UAS-RNAi-InR]* females are significant  
 9 (one-way ANOVA ( $F_{(1, 27)}=27.20$ ,  $p < 0.001$ )).

10 ***Decreased InR expression in the CA results in decreased alkaline phosphatase and tyrosine***  
 11 ***hydroxylase activities and decreases in the reactivity of these enzymes to stress***

12 The ALP and TH activities of 1-day-old *Aug21-Gal4/p[UAS-RNAi-InR]* and control (*i.e.*,  
 13 *p[UAS-RNAi-InR]/CyO::arm-GFP*, *p[UAS-RNAi-InR]/CyO* and *Aug21-Gal4/CyO::arm-GFP*)  
 14 females were measured under normal and heat stress conditions. As shown in Fig 5A and C, a  
 15 significant decrease in ALP and TH activities was observed in InR- (*Aug21-Gal4/p[UAS-RNAi-*  
 16 *InR]*) females. No statistical significance between the ALP or TH activities of the control InR+  
 17 groups (*p[UAS-RNAi-InR]/CyO::arm-GFP*, *p[UAS-RNAi-InR]/CyO* and *Aug21-Gal4/CyO::arm-*  
 18 *GFP*) under normal conditions was found. Comparison of InR downregulation and heat stress  
 19 effects on ALP and TH activity levels in females by two-way ANOVA with genotype and  
 20 temperature as fixed factors revealed significant effects of genotype ( $(F_{(3, 164)}=38.84$ ,  $p < 0.00001$ )  
 21 on ALP activity and ( $F_{(3, 191)}=12.75$ ,  $p < 0.00001$ ) on TH activity) and heat stress ( $(F_{(1, 164)}=200.04$ ,  
 22  $p < 0.00001$ ) on ALP activity and ( $F_{(1, 191)}=1205.76$ ,  $p < 0.00001$ ) on TH activity). A significant  
 23 interaction of these factors in females was also found ( $(F_{(3, 164)}=10.80$ ,  $p < 0.00001$ ) for ALP and  
 24 ( $F_{(3, 191)}=26.11$ ,  $p < 0.00001$ ) for TH).

25 To determine whether downregulation of InR in the CA affect the ALP and TH responses  
 26 to stress in *Drosophila*, we calculated ALP and TH stress reactivities. No difference in ALP stress  
 27 reactivity was found among the control groups ( $40 \pm 2$  for *p[UAS-RNAi-InR]/CyO::arm-GFP*,  $40 \pm 2$   
 28 for *p[UAS-RNAi-InR]/CyO* and  $37 \pm 3$  for *Aug21-Gal4/CyO::arm-GFP*). A lack of differences is  
 29 also observed for TH stress reactivity in these groups, with values of  $58 \pm 1$  for *p[UAS-RNAi-*  
 30 *InR]/CyO::arm-GFP*,  $63 \pm 1$  for *p[UAS-RNAi-InR]/CyO* and  $59 \pm 2$  for *Aug21-Gal4/CyO::arm-*  
 31 *GFP*. In contrast, ALP and TH stress reactivities in *Aug21-Gal4/p[UAS-RNAi-InR]* females were  
 32 significantly decreased:  $19 \pm 1$  for ALP and  $45 \pm 1$  for TH (one-way ANOVA ( $F_{(3, 78)}=31.48$ ,  $p <$   
 33  $0.001$ ) on ALP stress reactivity and ( $F_{(3, 100)}=67.58$ ,  $p < 0.00001$ ) on TH stress reactivity).

1 ***Juvenile hormone rescues alkaline phosphatase and tyrosine hydroxylase activities and their***  
 2 ***stress reactivities in females with decreased InR expression in CA***

3 To determine whether the observed changes in the activity and stress reactivity of ALP and  
 4 TH in *Aug21-Gal4/p[UAS-RNAi-InR]* females are related to the decreased JH levels in these  
 5 animals, we studied the effect of JH dissolved in acetone on these parameters. For comparison,  
 6 *Aug21-Gal4/p[UAS-RNAi-InR]* and *p[UAS-RNAi-InR]/CyO::arm-GFP* females were treated with  
 7 pure acetone. Half of the individuals in each group under study were exposed to heat stress.

8 As shown in Fig 5B and D, JH treatment of *Aug21-Gal4/p[UAS-RNAi-InR]* (InR-) females  
 9 increased ALP and TH activities to levels typical of *p[UAS-RNAi-InR]/CyO::arm-GFP* flies  
 10 (InR+(1)). Comparison of JH treatment and heat stress effects on the ALP and TH activities of  
 11 *Aug21-Gal4/p[UAS-RNAi-InR]* females by two-way ANOVA with JH treatment and temperature  
 12 as fixed factors revealed significant effects of JH treatment ( $F_{(1, 36)}=158.43$ ,  $p < 0.00001$ ) and heat  
 13 stress ( $F_{(1, 36)}=267.89$ ,  $p < 0.00001$ ) on ALP activity and of JH treatment ( $F_{(1, 70)}=57.85$ ,  
 14  $p < 0.00001$ ) and heat stress ( $F_{(1, 70)}=332.10$ ,  $p < 0.00001$ ) on TH activity. Interaction of these  
 15 factors was found for both ALP ( $F_{(1, 36)}=82.41$ ,  $p < 0.00001$ ) and TH ( $F_{(1, 70)}=44.01$ ,  $p = 0.0038$ ).  
 16 ALP and TH stress reactivities in JH-treated *Aug21-Gal4/p[UAS-RNAi-InR]* females ( $42 \pm 1$  and  
 17  $54 \pm 1$ , correspondingly) were also increased compared to acetone-treated *Aug21 Gal4/p[UAS-*  
 18 *RNAi-InR]* females ( $18 \pm 4$  and  $36 \pm 1$ , correspondingly), and approached the levels of *p[UAS-RNAi-*  
 19 *InR]/CyO::arm-GFP* females treated with acetone ( $39 \pm 1$  for ALP and  $56 \pm 1$  for TH). The  
 20 differences in stress reactivity between JH and acetone-treated *Aug21-Gal4/p[UAS-RNAi-InR]*  
 21 females are significant (one-way ANOVA  $F_{(1, 18)}=41.33$ ,  $p < 0.0001$  on ALP stress reactivity  
 22 and  $(F_{(1, 43)}=121.71$ ,  $p < 0.001$  on TH stress reactivity).

23 **Discussion**

24 As mentioned above, InR expression was detected in CA, the gland that produces JH  
 25 (Belgacem and Martin, 2006). Belgacem and Martin (2007) have also shown that InR in CA  
 26 controls the expression of 3-hydroxy-3-methylglutaryl coenzyme A reductase, the enzyme that  
 27 catalyses the synthesis of mevalonate, the precursor of the JH family (Belles et al., 2005)) in adult  
 28 *Drosophila*. *In vitro*, it has been shown that a mutation of the *InR* gene leads to decreased JH  
 29 production in adult *Drosophila* (Tatar et al., 2001, Tu et al., 2005).

30 To study the effect of RNAi knockdown of *InR* in the CA on JH synthesis *in vivo*, we used  
 31 JH degradation level, stress reactivity of the JH metabolic system, and fecundity as indicators of  
 32 JH production. Indeed, in *D. melanogaster* females, JH biosynthesis and degradation tend to show



1 an inverse relationship; JH production measured *in vitro* (Altaratz *et al.*, 1991) is significantly  
2 higher in 1-day-old than in 5 to 6-day-old females (wild-type strain *Canton S*), whereas JH  
3 degradation measured *in vivo* is significantly lower in young than in mature *Canton S* females  
4 (Gruntenko *et al.*, 2003b). The dramatically decreased JH production measured *in vitro* in *D.*  
5 *melanogaster apterous*<sup>56f</sup> mutant females (Altaratz *et al.*, 1991) is paralleled by a marked increase  
6 in the measured *in vivo* activities of JH-esterase and JH-epoxide hydrolase, the enzymes that  
7 degrade JH (Gruntenko *et al.*, 2003b). In addition, we have demonstrated that a pharmacological  
8 increase in JH level in wild-type *D. virilis* females leads to a decrease in JH degradation  
9 (Rauschenbach *et al.*, 2004). Terashima and Bownes (2005) found that JH treatment of *D.*  
10 *melanogaster* females resulted in decreased expression of the *JH-epoxide hydrolase 3* gene. More  
11 recently, we showed that decreased JH synthesis resulting from genetic ablation of a subset of CA  
12 cells leads to increased JH degradation and stress reactivity of the JH metabolic system in  
13 *D. melanogaster* females and to a dramatic decrease in their fecundity (Gruntenko *et al.*, 2010).  
14 Taken together, these studies indicate that JH degradation, JH stress reactivity and fecundity may  
15 be useful parameters for assessing the level of JH synthesis *in vivo*. Assessment of these parameters  
16 in young female *D. melanogaster* provided evidence that RNAi-knockdown of *InR* in the CA leads  
17 to decreased JH production; in *Aug21-Gal4/p[UAS-RNAi-InR]* females, JH degradation and the  
18 stress reactivity of the JH metabolic system are increased (see Fig. 2), while fecundity is  
19 dramatically decreased (see Fig. 3A). The results of the experiments with JH treatment also  
20 indicate the decreased JH synthesis in these females: the exogenous hormone rescued JH  
21 degradation (see Fig. 2B), JH stress reactivity and fecundity (see Fig. 3B) in the females *Aug21-*  
22 *Gal4/p[UAS-RNAi-InR]* to the levels of control flies.

23 In earlier work, we showed that JH regulates DA content in *Drosophila*: an increase or  
24 decrease in JH titer leads to a decrease or an increase in DA content *via* an increase or a decrease  
25 in DAT activity in young females (Rauschenbach *et al.*, 2008, 2011; Gruntenko *et al.*, 2012a).  
26 Considering this, we supposed that the IIS, by controlling the level of JH, could also affect the  
27 metabolism of DA. Measurement of DA content and DAT activity in *Aug21-Gal4/p[UAS-RNAi-*  
28 *InR]* females, which specifically downregulate *InR* in the CA, and in control *p[UAS-RNAi-*  
29 *InR]/CyO::arm-GFP* flies (see Fig. 4A,B) confirmed our supposition: DAT activity is decreased  
30 and DA level is increased in 1-day-old *Aug21-Gal4/p[UAS-RNAi-InR]* females. The fact that  
31 exogenous JH restored DAT activity (see Fig. 4C) indicates that the influence of the IIS on DA  
32 metabolism is indeed mediated by JH.

1 As we previously demonstrated, DA downregulates the activity of the enzymes of its  
2 synthesis, ALP and TH (Gruntenko et al., 2009; Bogomolova et al., 2010). Taking this into  
3 account, one might expect that the activities of ALP and TH would be changed in females with  
4 increased DA levels resulting from decreased InR expression in the CA. Measurements of the  
5 activities of these enzymes confirmed our expectations: in *Aug21-Gal4/p[UAS-RNAi-InR]*  
6 females, ALP and TH activities were decreased compared to control  
7 *p[UAS-RNAi-InR]/CyO::arm-GFP* females (see Fig. 5A,C). The effects of RNAi knockdown of  
8 *InR* in the CA on ALP and TH activities, as well as on DAT, are mediated by JH as shown by the  
9 fact that application of JH to *Aug21-Gal4/p[UAS-RNAi-InR]* flies restores the activity of both  
10 enzymes of DA synthesis (see Fig. 5B,D).

11 It is important to emphasise that decreased InR expression in the CA leads to defects in the  
12 development of the neuroendocrine stress reaction. In *Aug21-Gal4/p[UAS-RNAi-InR]* females, the  
13 response of all of the studied components of the stress reaction to heat treatment is changed. Note  
14 that the effects of decreased InR expression in the CA on the stress response are mediated by JH;  
15 exogenous JH restores stress reactivity of the JH and DA metabolic systems in the *Aug21-*  
16 *Gal4/p[UAS-RNAi-InR]* females to the level of that in control flies.

17 The results of our research provide evidence that IIS regulates DA metabolism indirectly  
18 via JH in females of *D. melanogaster* and show that it has an effect on the neuroendocrine stress  
19 reaction and that it interacts with JH in the control of reproductive functions in this species.

20

## 21 **Materials and methods**

### 22 ***Drosophila* strains and genetic experiments**

23 The following *Drosophila* strains were utilised in the current study: (1) the  
24 *Aug21-Gal4/CyO::arm-GFP* strain carrying the driver *Aug21-Gal4* that is expressed specifically  
25 in the CA of larvae (Mirth et al., 2005) and adults (Gruntenko et al., 2012a) of *D. melanogaster*;  
26 (2) the *p[UAS-RNAi-InR]/CyO* strain carrying an RNAi against the *InR* gene inserted on the  
27 chromosome II. Crossing *Aug21-Gal4/CyO::arm-GFP* with *p[UAS-RNAi-InR]/CyO* flies leads to  
28 two types of progeny: *Aug21-Gal4/p[UAS-RNAi-InR]*, where downregulation of InR is targeted to  
29 CA cells, and *p[UAS-RNAi-InR]/CyO::arm-GFP* siblings are used as control. The parental strains  
30 serve as additional controls. Note that the presence of mutations in the balancer chromosome CyO  
31 should not affect the results of the study as we have previously demonstrated that these mutations  
32 do not affect the parameters studied in this work (Gruntenko et al., 2010, 2012a,b). To permit

1 visualisation of CA cells, the *Aug21-Gal4::UAS-RFP* strain was produced by recombination of  
2 *Aug21-Gal4* with  $P\{UASp-Act5C.mRFP\}$  (the strain  $w^*;P\{UASp-Act5C.mRFP\}38$  was obtained  
3 from the Bloomington Drosophila Stock Center).

4 Crosses were maintained at 29°C to enhance RNAi-induced phenotypes (Fortier and Belote,  
5 2000; Draper et al., 2007) in a 12 h light:12 h dark (LD 12:12) cycle on standard *Drosophila*  
6 medium. After eclosion, flies were collected (flies eclosed within 3 to 4 hours were pooled) and  
7 maintained at 25°C.

### 8 ***Immunohistochemical analyses***

9 Immunohistochemistry was performed as described by Gruntenko *et al.* (2012b). The  
10 cardia and *corpus cardiacum/corpus allatum* complex from flies selectively expressing red  
11 fluorescent protein (RFP) in CA cells were dissected and fixed in 4% paraformaldehyde (Sigma-  
12 Aldrich, USA), incubated 2 hours at room temperature and washed three times in PBS and three  
13 times in PBST (PBS + 0,05% Triton X-100). The tissues were subsequently blocked for three  
14 hours in 10% normal goat serum in PBST. A primary mouse monoclonal IgG1 anti-insulin  
15 receptor ( $\alpha$  subunit) antibody (Millipore Corporation, Billerica, MA, USA) at a dilution of 1:20  
16 was added, and the tissues were incubated overnight at 4°C. After three washes in PBST, bound  
17 primary antibodies were detected by a secondary antibody, ALEXA488 goat anti-mouse IgG  
18 (Invitrogen, Molecular Probes, Eugene, OR, USA), at a dilution of 1:500. After three washes in  
19 PBST and one in PBS, the tissues were embedded in Vectashield mounting medium for  
20 fluorescence (with DAPI, Vector Laboratories Inc., Burlingame, CA, USA) and observed by  
21 fluorescence microscopy (Axioscope 2, Zeiss, microscopy center, ICG).

### 22 ***JH-hydrolysing activity assay***

23 JH hydrolysis was measured as described by Gruntenko *et al.* (2012a). Each fly was  
24 homogenised in 30  $\mu$ l of ice-cold 0.1 M sodium phosphate buffer, pH 7.4, containing 0.5 mM  
25 phenylthiourea. The homogenates were centrifuged for 5 min at 13,030 g, and samples of the  
26 supernatant (10  $\mu$ l) were taken for the assay. A mixture consisting of 0.1  $\mu$ g of unlabelled JH-III  
27 (Fluka, Buchs, Switzerland, additionally purified before use) and 12,500 dpm JH-III, [ $10^{-3}$ H(N)]-  
28 (15 Ci/mmol, Perkin Elmer, Waltham, MA, USA) was used as a substrate. The reaction was carried  
29 out in 100  $\mu$ l of the incubation mixture for 30 min and was stopped by the addition of 50  $\mu$ l of a  
30 solution containing 5% ammonia, 50% methanol (V/V), and 250  $\mu$ l of heptane. The tubes were  
31 shaken vigorously and centrifuged at 13,030 g for 10 min. Samples (100  $\mu$ l) of both the organic  
32 and aqueous phases were placed in vials containing dioxane scintillation fluid and counted. Control

1 experiments showed a linear substrate-reaction product relationship; the activity measured is  
2 proportional to the amount of supernatant (i.e., enzyme concentration) (Gruntenko *et al.*, 2000).  
3 Before JH-hydrolysing activities were measured, half of the flies in each group under study were  
4 exposed to heat stress.

### 5 ***Heat stress***

6 Flies were exposed to heat stress by transferring vials containing experimental flies from a  
7 25°C incubator to a 38°C incubator for 1 hour (when examining DA and TH responses to stress)  
8 or for 1.5 hours (when examining ALP and JH degradation responses to stress).

### 9 ***JH treatment***

10 Newly eclosed females were placed in vials with standard medium (five flies per vial).  
11 Twenty-four hours later, the females were treated with 0.1 µg JH-III (Sigma-Aldrich, USA)  
12 dissolved in 0.5 µl of acetone. Control females were treated with acetone (0.5 µl). Ten hours after  
13 JH or acetone application, the flies were frozen in liquid nitrogen and stored at -20°C. Half of the  
14 JH- and acetone-treated flies were exposed to heat stress.

### 15 ***Dopamine concentration measurements***

16 DA concentration was measured as described by Gruntenko *et al.* (2012a). Flies were  
17 homogenised on ice in 0.1 M HClO<sub>4</sub>. The homogenates were centrifuged for 10 min at 13,030 g.  
18 The supernatant was filtered through a nylon syringe filter (Whatman, Schleicher&Schuell,  
19 4 mm/0.45 µm, Germany), and 10 µl was injected directly onto an HPLC column through a valve  
20 fitted with a 20-µl sample loop. Chromatography was carried out in a C18 reverse-phase column  
21 (Diaspher-110-C18, 2.1x150 mm, 5 µm average particle size, BioChemMak, Russia) using an  
22 Agilent 1100 HPLC system with a quaternary pump, vacuum degasser and thermostatically  
23 controlled column compartment. The separated compounds were detected simultaneously by a  
24 variable wavelength detector (10-mm path length, 13-µl cell volume) set at 280 nm. Signals from  
25 the UV detector were recorded and integrated by a PC (Agilent ChemStation A.08.04). The flow  
26 rate was maintained at 0.3 ml/min. The mobile phase consisted of 0.025 M KH<sub>2</sub>PO<sub>4</sub> (pH 3.0), 1  
27 mM sodium octanesulfonate as an ion-pair reagent and 5% (v/v) acetonitrile. The concentration of  
28 DA was calculated by comparing the peak areas of the sample with those of standards. The identity  
29 of the DA peak in *Drosophila* samples was confirmed by comparison of its retention time with  
30 that of the standard mixture. The UV spectra of the DA peaks in *Drosophila* samples corresponded  
31 to the UV spectrum of DA. Moreover, we added excess quantities of DA (20 ng/100 µl of sample)  
32 to some *Drosophila* samples to register the changes in area of the appropriate peaks.

### 1 ***DA-dependent arylalkylamine N-acetyltransferase activity measurements***

2           DAT activity was measured as described previously (Rauschenbach et al., 2008). Flies  
3 were homogenised on ice in 0.05 M Tris buffer (pH 7.2), one individual in 60 µl. The homogenates  
4 were centrifuged 5 min at 13,030 g. The components of the reaction mixture were added to a  
5 cuvette as follows: 50 µl of 0.05 M Tris (pH 7.2, Sigma-Aldrich, USA), 50 µl of acetyl CoA (0.5  
6 mM, Fluka, Buchs, Switzerland, in 0.05 M Tris (7.2)), 25 µl of 12 mM phenylthiourea (Fluka,  
7 Buchs, Switzerland), 25 µl of substrate (40 mM DA, Sigma, Steinheim, Germany, in 0.001 N  
8 HCl), 50 µl of the supernatant, and 50 µl of 5,5-dithiobis-(2-nitro-benzoic acid) (2.4 mM, Fluka,  
9 Buchs, Switzerland, in 0.05 M Tris). The samples were incubated for 2 min at room temperature  
10 in the dark. The optical density of the reaction product was measured with a double-beam  
11 spectrophotometer (UV-2401PC, Shimadzu Corporation, Kyoto, Japan) at a wavelength of 405  
12 nm against the reaction zero point. DAT activity is represented in relative units (optical density x  
13 100).

### 14 ***Alkaline phosphatase activity measurements***

15           ALP assays were performed as described previously (Rauschenbach et al., 2007). Flies  
16 were homogenised on ice in 0.1 M Tris-phosphate buffer, pH 8.60 (Sigma-Aldrich, USA) (1 fly  
17 in 20 µl). The homogenates were centrifuged for 5 min at 13,030 g. Enzyme activity in the  
18 supernatant was determined using  $\alpha$ -naphthylphosphate (ICN, Moscow, Russia) as substrate and  
19 fast blue RR salt (Chemapol, Czech Republic) as stain. After centrifugation, the supernatant was  
20 transferred to a microtube (1.5 ml; Eppendorf, Germany) to which 1 ml of reaction mixture (100  
21 ml 0.1 M Tris buffer pH 8.60, 100 mg  $\alpha$ -naphthylphosphate, 100 mg fast blue RR salt, 230 µl 10%  
22 MnCl<sub>2</sub>, 230 µl 10% MgCl<sub>2</sub>, 0.5 g polyvinylpyrrolidone (ICN, Moscow, Russia), and 2 g NaCl) was  
23 added. Incubation was carried out at room temperature in the dark for 25 min, and the reaction was  
24 stopped by the addition of 3 ml of ice-cold distilled water. The optical density of the obtained  
25 reaction product was measured at 470 nm using a Bio-Rad SmartSpec Plus spectrophotometer  
26 (Bio-Rad Laboratories, Philadelphia, PA, USA). ALP activity is represented in relative units  
27 (optical density x 100).

### 28 ***Tyrosine hydroxylase activity measurements***

29           TH assays were performed as described previously (Gruntenko et al., 2009). Flies were  
30 homogenised in chilled 0.1 M acetate buffer, pH 7.0 (1 fly in 10 µl) and centrifuged at 13,030 g  
31 for 5 min; the supernatant was used for the reaction. The reaction mixture (100 µl) consisted of

1 0.1 mM L-tyrosine (Sigma, Steinheim, Germany), 1  $\mu$ Ci L-[ring-3,5-<sup>3</sup>H] tyrosine (40 Ci/mmol,  
2 Perkin Elmer, Boston, MA, USA), 1 mM (6R)-5,6,7,8-tetrahydrobiopterin (Sigma-Aldrich, USA),  
3 80 mM  $\beta$ -mercaptoethanol and 20  $\mu$ g catalase (Fluka, Buchs, Switzerland) in 0.1 M acetate buffer  
4 (pH 7.0). Incubation was carried out for 15 min at 32°C. All assays were run in duplicate with zero  
5 time controls and terminated by addition of 1 ml of 7.5% activated charcoal (Darco G60, Fluka,  
6 Buchs, Switzerland). The assay mixtures were stirred for 10 min and centrifuged at 13,030 g for 5  
7 min; 100  $\mu$ l aliquots of the supernatant were transferred to scintillation vials and counted using a  
8 Rackbeta 1209 (Vellag, Turku, Finland) scintillation counter.

### 9 ***Fecundity analysis***

10 Fecundity analysis was performed as follows: 3 newly eclosed females and 3 males were  
11 placed into vials, the bottom and 1 cm of the walls of which were covered with filter paper soaked  
12 in 0.5 ml of nutritional medium containing 0.5% sucrose and 0.1% yeast. The flies were transferred  
13 to vials with fresh medium daily. To study the effect of JH on fecundity, 3-day-old females were  
14 treated with acetone or JH as described above and their fecundity was evaluated. Fecundity was  
15 determined as the number of eggs laid by a female within 24 hours (the number of eggs laid in  
16 each vial was related to the number of females held in the vial for 24 hours).

### 17 ***Statistical analysis***

18 The stress reactivities of DA, TH, ALP and JH were calculated as percent change in DA  
19 level or ALP, TH or JH-hydrolysing activities following heat stress relative to the values of the  
20 corresponding parameters obtained under normal conditions (each value obtained at 38°C was  
21 compared to the average value obtained at 25°C). The significance of differences between the data  
22 sets was tested by one-way and two-way ANOVA. The data on fecundity were analysed using  
23 two-way mixed-design ANOVA. Statistical comparisons between groups were performed using  
24 the Newman-Keuls post-hoc test.

25

### 26 **List of symbols and abbreviations**

27 JH - juvenile hormone

28 CA - *corpus allatum*

29 20E - 20-hydroxyecdysone

30 DA – dopamine

31 OA – octopamine

- 1 ALP - alkaline phosphatase  
2 TH - tyrosine hydroxylase  
3 DAT - DA-dependent arylalkylamine N-acetyltransferase  
4 IIS - insulin/insulin-like growth factor signaling pathway  
5 DILP - insulin-like peptide  
6 InR – insulin-like receptor

## 7 **Acknowledgements**

8 We are grateful to Prof. Jean-Rene Martin (Laboratoire de Neurobiologie Cellulaire et  
9 Moleculaire, CNRS, Gif-sur-Yvette, France) for *D. melanogaster* strain *p[UAS-RNAi-InR]/CyO*.  
10 We are also grateful to Prof. Sheng Li (Institute of Plant Physiology and Ecology, Shanghai  
11 Institute of Biological Sciences of the Chinese Academy of Sciences) for *D. melanogaster* strain  
12 *Aug21-Gal4/CyO::arm-GFP*.

## 13 **Competing interests**

14 The author declares no competing financial interests.

## 15 **Author contributions**

16 All authors contributed to the conception, design, execution and interpretation of the findings.

## 17 **Funding**

18 The study was supported by the grants of Russian Foundation for Basic Research [12-04-00065,  
19 13-04-00019] and Russian Federation Basic Project #VI.53.2.3.

## 20 **References**

- 21 Altaratz, M., Applebaum, Sh.W., Richard, D.S., Gilbert, L.I., Segal, D. (1991) Regulation of  
22 juvenile hormone synthesis in wild-type and apterous mutant *Drosophila*. *Mol. Cell.*  
23 *Endocrinol.* 81, 205-216.  
24 Andersen, J.P., Schwartz, A., Gramsberggen, J.B., Loeschcke, V. (2006). Dopamine levels in the  
25 mosquito *Aedes aegypti* during adult development, following blood feeding and in response to  
26 heat stress. *J. Insect Physiol.* **52**, 1163–1170.  
27 Belgacem, Y.H., Martin, J.R. (2002). Neuroendocrine control of a sexually dimorphic behavior by  
28 a few neurons of the pars intercerebralis in *Drosophila*. *Proc. Nat. Acad. Sci.* **99**: 15154–15158.  
29 Belgacem, Y.H., Martin, J.R. (2006). Disruption of insulin pathways alters trehalose level and  
30 abolishes sexual dimorphism in locomotor activity in *Drosophila*. *J. Neurobiol.* **66**, 19–32.

- 1 Belgacem, Y.H., Martin, J-R. (2007). Hmgcr in the corpus allatum controls sexual dimorphism of  
2 locomotor activity and body size via the insulin pathway in *Drosophila*. *PLoS ONE*. **2(1)**,  
3 e187.
- 4 Bogomolova, E.V., Rauschenbach, I.Yu., Adonyeva, N.V., Alekseev, A.A., Faddeeva, N.V.,  
5 Gruntenko, N.E. (2010). Dopamine down-regulates activity of alkaline phosphatase in  
6 *Drosophila*: the role of D2-like receptors. *J. Insect Physiol.* **56**, 1155-1159
- 7 Broughton, S.J., Piper, M.D., Ikeya, T., Bass, T.M., Jacobson, J., Driege, Y., Martinez, P., Hafen,  
8 E., Withers, D.J., Leever, S.J., Partridge, L. (2005). Longer lifespan, altered metabolism, and  
9 stress resistance in *Drosophila* from ablation of cells making insulin-like ligands. *Proc. Nat.*  
10 *Acad. Sci.* **102**, 3105–3110.
- 11 Clancy, D.J., Gems, D., Harshman, L.G., Oldham, S., Stocker, H., Hafen, E., Leever, S.J.,  
12 Partridge, L. (2001). Extension of life-span by loss of CHICO, a *Drosophila* insulin receptor  
13 substrate protein. *Science*. **292**, 104-106.
- 14 Colombani, J., Bianchini, L., Layalle, S., Pondeville, E., Dauphin-Villemant, Ch., Antoniewski,  
15 Ch., Carre, C., Noselli, S., Leopold, P. (2005). Antagonistic actions of ecdysone and insulins  
16 determine final size in *Drosophila*. *Science*. **310**, 667-670
- 17 Cymborowski, B. (1991). Effects of cold stress on endocrine system in *Galleria melonella*. In:  
18 Ivanovic, J., Jankovic-Hladni, M. (Eds.), Hormones and metabolism in insect stress, CRC Press,  
19 Boca Raton, pp. 99-114.
- 20 Davenport, A.K., Evans, P.D. (1984). Stress-induced changes in octopamine levels of insect  
21 haemolymph. *Insect Biochem.* **14**, 135-143.
- 22 Draper, I., Kurshan, P.T., McBride, E., Jackson, F.R., Kopin, A.S. (2007). Activity is regulated by  
23 D2-like receptors in *Drosophila*: an anatomic and functional analysis. *Dev. Neurobiol.* **67**,  
24 378-393.
- 25 Fortier, E., Belote, J.M. (2000). Temperature-dependent gene silencing by an expressed inverted  
26 repeat in *Drosophila*. *Genesis*, **26**, 240–244.
- 27 Gruntenko, N.E., Bogomolova, E.V., Adonyeva, N.V., Karpova, E.K., Menshanov, P.N.,  
28 Alekseev, A.A., Romanova, I.V., Li, S., Rauschenbach, I.Yu. (2012a). Decrease in juvenile  
29 hormone level as a result of genetic ablation of the corpus allatum cells affects the synthesis  
30 and metabolism of stress related hormones in *Drosophila*. *J. Insect Physiol.* **58**, 49-55.
- 31 Gruntenko, N.E., Bownes, M., Terashima, J., Sukhanova, M.Zh., Rauschenbach, I.Yu. (2003a).



- 1 Heat stress affects oogenesis differently in wild type *Drosophila virilis* and a mutant with  
2 altered juvenile hormone and 20-hydroxyecdysone levels. *Insect Mol. Biol.* **12**, 393-404.
- 3 Gruntenko, N.E., Chentsova, N.A., Andreenkova, E.V., Bownes, M., Segal, D., Adonyeva, N.V.,  
4 Rauschenbach, I.Yu., (2003b). Stress response in a juvenile hormone deficient *Drosophila*  
5 *melanogaster* mutant *apterous*<sup>56f</sup>. *Insect Mol. Biol.* **12**, 353-363.
- 6 Gruntenko N.E., Chentsova N.A., Bogomolova E.V., Karpova E.K., Glazko G.V., Faddeeva N.V.,  
7 Monastiriotti M., Rauschenbach I.Yu. (2004). The effect of mutations altering biogenic amine  
8 metabolism in *Drosophila* on viability and the response to environmental stresses. *Arch. Insect*  
9 *Biochem. Physiol.* **55**, 55–67.
- 10 Gruntenko, N.E., Karpova, E.K., Chentsova, N.A., Adonyeva, N.V., Rauschenbach, I.Yu. (2009).  
11 20-hydroxyecdysone and juvenile hormone influence tyrosine hydroxylase activity in  
12 *Drosophila* females under normal and heat stress conditions. *Arch. Insect Biochem. Physiol.*  
13 **72**, 263-272.
- 14 Gruntenko, N.E., Laukhina, O.V., Bogomolova, E.V., Karpova, E.K., Faddeeva, N.V.,  
15 Menshanov, P.N., Romanova, I.V., Rauschenbach, I.Yu. (2012b). Downregulation of the  
16 dopamine 2-like receptor in *corpus allatum* affects juvenile hormone metabolism in *Drosophila*  
17 *melanogaster* females. *J. Insect Physiol.* **58**, 348-355.
- 18 Gruntenko, N.E., Monastiriotti, M., Wilson, T.G., Rauschenbach, I.Yu. (2000). Stress-reactivity  
19 and juvenile hormone degradation in *Drosophila melanogaster* strains having stress-related  
20 mutations. *Insect Biochem. Mol. Biol.* **30**, 775-783.
- 21 Gruntenko, N.E., Rauschenbach, I.Yu. (2008). Interplay of juvenile hormone, 20-hydroxyecdysone  
22 and biogenic amines under normal and stress conditions and its effect on reproduction. *J. Insect*  
23 *Physiol.* **56**, 902-908.
- 24 Gruntenko, N.E., Wen, D., Karpova, E.K., Adonyeva, N.V., Liu, Y., He, Q., Faddeeva, N.V.,  
25 Fomin, A.S., Li, S., Rauschenbach, I.Yu. (2010). Altered juvenile hormone metabolism,  
26 reproduction and stress response in *Drosophila* adults with genetic ablation of the corpus  
27 allatum cells. *Insect Biochem. Mol. Biol.* **40**, 891-897.
- 28 Gulia-Nuss, M., Robertson, A.E., Brown, M.R., Strand, M.R.(2011). Insulin-like peptides and the  
29 target of rapamycin pathway coordinately regulate blood digestion and egg maturation in the  
30 mosquito *Aedes aegypti*. *PLoS ONE*, **6(5)**, e20401.
- 31 Hirashima, A., Eto, M. (1993). Effect of stress on levels of octopamine, dopamine and serotonin

- 1 in the American cockroach (*Periplaneta americana* L.). *Comp. Biochem. Physiol.* **105C**, 279-  
2 284.
- 3 Hirashima, A., Rauschenbach, I.Yu., Sukhanova, M.Jh. (2000a). Ecdysteroids in stress responsive  
4 and nonresponsive *Drosophila virilis* lines under stress conditions. *Biosci. Biotech. Biochem.*  
5 **64**, 2657-2662.
- 6 Hirashima, A., Sukhanova, M.Jh., Rauschenbach, I.Yu. (2000b). Biogenic amines in *Drosophila*  
7 *virilis* under stress conditions. *Biosci. Biotech. Biochem.* **64**, 2625-2630.
- 8 Kannan, K., Fridell, Y.W. (2013). Functional implications of *Drosophila* insulin-like peptides in  
9 metabolism, aging, and dietary restriction. *Front. Physiol.* **4**, 28.
- 10 Lalouette, L., Kosta, L. V., Colinet, H., Gagneul, D., Renault, D. (2007). Cold exposure and  
11 associated metabolic changes in adult tropical beetles exposed to fluctuating thermal regimes.  
12 *FEBS J.* **274**, 1759–1767.
- 13 Mirth, C., Truman, J.W., Riddiford, L.M. (2005). The role of the prothoracic gland in determining  
14 critical weight for metamorphosis in *Drosophila melanogaster*. *Curr. Biol.* **15**, 1796-1807.
- 15 Neckameyer, W.S., Weinstein, J.S. (2005). Stress affects dopaminergic signalling pathways in  
16 *Drosophila melanogaster*. *Stress.* **8**, 117-131.
- 17 Orchard, I., Loughton, B.G. (1981). Octopamine and short-term hyperlipaemia in the locust. *Gen.*  
18 *Comp. Endocrinol.* **45**, 175-180
- 19 Piper, M.D., Selman, C., McElwee, J.J., Partridge, L. (2008). Separating cause from effect: how  
20 does insulin/IGF signalling control lifespan in worms, flies and mice? *J. Intern. Med.* **263**, 179–  
21 191.
- 22 Rauschenbach, I. Yu, Adonyeva, N. V., Alekseev, A. A., Chentsova, N. A., Gruntenko, N. E.  
23 (2008). Role of arylalkylamine N-acetyltransferase in regulation of biogenic amines levels by  
24 gonadotropins in *Drosophila*. *J. Comp. Physiol. B.* **178**, 315-320
- 25 Rauschenbach, I.Yu., Bogomolova, E.V., Gruntenko, N.E, Adonyeva, N.V., Chentsova, N.A.  
26 (2007). Effects of Juvenile hormone and 20-hydroxyecdysone on alkaline phosphatase activity  
27 in *Drosophila* under normal and heat stress conditions. *J. Insect Physiol.* **53**, 587-591.
- 28 Rauschenbach, I.Yu., Bogomolova, E.V., Karpova, E.K., Adonyeva, N.V., Faddeeva, N.V.,  
29 Menshanov, P.N., Gruntenko N.E. (2011). Mechanisms of age-specific regulation of dopamine

- 1 metabolism by juvenile hormone and 20-hydroxyecdysone in *Drosophila* females. *J. Comp.*  
2 *Physiol. B.* **181**, 19-26.
- 3 Rauschenbach, I.Y., Gruntenko, N.E., Bownes, M., Adonieva, N.V., Terashima, J., Karpova, E.K.,  
4 Faddeeva, N.V., Chentsova, N.A. (2004). The role of juvenile hormone in the control of  
5 reproductive function in *Drosophila virilis* under nutritional stress. *J. Insect Physiol.* **50**, 323-  
6 330.
- 7 Rauschenbach, I.Y., Khlebodarova, T.M., Chentsova, N.A., Gruntenko, N.E., Grenback, L.G.,  
8 Yantsen, E.I., Filipenko, M.L. (1995a). Metabolism of the juvenile hormone in *Drosophila*  
9 adults under normal conditions and heat stress. *J. Insect Physiol.* **41**, 179-189.
- 10 Rauschenbach, I.Y., Lukashina, N.S., Maksimovsky, L.F., Korochkin, L.I. (1987). Stress-like  
11 reaction of *Drosophila* to adverse environmental factors. *J. Comp. Physiol. B.* **157**, 519-531.
- 12 Rauschenbach, I.Y., Serova, L.I., Timochina, I.S., Chentsova, N.A., Schumnaja, L.V. (1993).  
13 Analysis of differences in dopamine content between two lines of *Drosophila virilis* in response  
14 to heat stress. *J. Insect Physiol.* **39**, 761-767.
- 15 Rauschenbach, I.Y., Shumnaya, L.V., Khlebodarova, T.M., Chentsova, N.A., Grenback, L.G.  
16 (1995b). Role of phenol oxidases and tyrosine hydroxylase in control of dopamine content in  
17 *Drosophila virilis* under normal conditions and heat stress. *J. Insect Physiol.* **41**, 279-286.
- 18 Rauschenbach IY, Sukhanova MZ, Shumnaya LV, Gruntenko NE, Grenback LG, Khlebodarova  
19 TM, Chentsova NA (1997). Role of dopa decarboxylase and N-acetyltransferase in regulation  
20 of dopamine content in *Drosophila virilis* under normal and heat stress conditions. *Insect*  
21 *Biochem. Mol. Biol.* **27**, 729-734
- 22 Richard, D.S., Rybczynski, R., Wilson T.G., Wang Y., Wayne M.L., Zhou Y., Partridge L.,  
23 Harshman L.G. (2005). Insulin signaling is necessary for vitellogenesis in *Drosophila*  
24 *melanogaster* independent of the roles of juvenile hormone and ecdysteroids: female sterility  
25 of the chico<sup>1</sup> insulin signaling mutation is autonomous to the ovary. *J. Insect Physiol.* **51**, 55–  
26 464
- 27 Roesijadi, G., Rezvankhah, S., Binninger, D., Weissbach, H. 2007. Ecdysone induction of MsrA  
28 protects against oxidative stress in *Drosophila*. *Biochemical and Biophysical Research*  
29 *Communications*, 354, 511–516.
- 30 Rulifson, E.J., Kim, S.K., Nusse, R. (2002). Ablation of insulin-producing neurons in flies: growth  
31 and diabetic phenotypes. *Science.* **296**, 1118-1120.

- 1 Shingleton, A.W., Das, J., Vinicius, L., Stern, D.L. (2005). The temporal requirements for insulin  
2 signaling during development in *Drosophila*. *PLoS Biology*. **3**, 1607-1617
- 3 Sukhanova, M.Jh., Grenback, L.G., Gruntenko, N.E., Khlebodarova, T.M., Rauschenbach, I.Yu.  
4 (1996). Alkaline phosphatase in *Drosophila* under heat stress. *J. Insect Physiol.* **42**, 161-165.
- 5 Sukhanova, M.Jh., Shumnaya, L.V., Grenback, L.G., Gruntenko, N.E., Khlebodarova, T.M.,  
6 Rauschenbach, I.Y. (1997). Tyrosine decarboxylase and dopa decarboxylase in *Drosophila*  
7 *virilis* under heat stress. *Biochem. Genet.* **35**, 91-103.
- 8 Tatar, M., Bartke, A., Antebi, A. (2003). The endocrine regulation of aging by insulin-like signals.  
9 *Science*. **299**, 1346–1351.
- 10 Tatar, M., Kopelman, A., Epstein, D., Tu, M.P., Yin, C.M., Garofalo, R.S. (2001). A mutant  
11 *Drosophila* insulin receptor homolog that extends life-span and impairs neuroendocrine  
12 function. *Science*. **292**, 107–110.
- 13 Terashima, J., Bownes, M. (2005). A microarray analysis of genes involved in relating egg  
14 production to nutritional intake in *Drosophila melanogaster*. *Cell Death Different.* **12**, 429-440.
- 15 Toivonen, J.M., Partridge, L. (2009). Endocrine regulation of aging and reproduction in  
16 *Drosophila*. *Mol. Cell. Endocrinol.* **299**, 39–50.
- 17 Tu, M-P., Yin, C-M., Tatar, M. (2002). Impaired ovarian ecdysone synthesis of *Drosophila*  
18 *melanogaster* insulin receptor mutants. *Aging Cell*. **1**, 158-160.
- 19 Tu, M-P., Yin, C-M., Tatar, M. (2005). Mutations in insulin signaling pathway alter juvenile  
20 hormone synthesis in *Drosophila melanogaster*. *Gen. Comp. Endocrinol.* **142**, 347–356.
- 21 Woodring, J.P., Meier, O.W., Rose, R. (1988). Effect of development, photoperiod, and stress on  
22 octopamine levels in the house cricket, *Acheta domestica*. *J. Insect Physiol.* **34**, 759-765.
- 23 Wright, T.R.F. (1987). Genetic of biogenic amines metabolism, sclerotisation and melanisation in  
24 *Drosophila melanogaster*. *Adv. Genet.* **24**, 127-221.

25  
26  
27

## 1 Figure legends

2 **Fig. 1.** InR immunoreactivity (green signal) in *corpus allatum* cells (red) of 1-day-old  
3 *D. melanogaster* females. (a) CA of *Aug21-Gal4;UAS-RFP* females; (a<sub>1</sub>) the same gland in the  
4 green channel. (b) CA of *Aug21-Gal4/p[UAS-InR-RNAi];UAS-RFP* females; (b<sub>1</sub>) the same gland  
5 in the green channel. Blue signal – cell nuclei stained with DAPI. Scale bar = 50 μm. (c) 1-day-  
6 old females: InR suppression - *Aug21-Gal4/p[UAS-InR-RNAi]* flies, control - *p[UAS-RNAi-  
7 InR]/CyO::arm-GFP* ones. (d) Weight of 1-day-old females.

8 **Fig. 2.** Effect of decreased InR expression in the CA on JH degradation. (A) JH degradation under  
9 normal conditions and upon heat stress (38°C, 1.5 h) in *Aug21-Gal4/p[UAS-InR-RNAi]* females  
10 (InR-) with decreased InR expression in CA cells in comparison with control groups:  
11 *p[UAS-RNAi-InR]/CyO::arm-GFP* (InR+(1)), *p[UAS-RNAi-InR]/CyO* (InR+(2)),  
12 *Aug21-Gal4/CyO::arm-GFP* (InR+(3)). (B) The effect of JH and acetone treatment on JH  
13 degradation under normal conditions and upon heat stress (38°C, 1.5 h) in InR- and InR+(1)  
14 females. The data are given as mean ± SE. The diamond indicates significant differences from  
15 InR- females; the asterisk indicates significant differences between heat-treated and control flies  
16 of the same genotype (Newman-Keuls post-hoc).

17 **Fig. 3.** Effect of decreased InR expression in the CA on reproduction. (A) The fecundity of *D.*  
18 *melanogaster* females with RNAi-knockdown of *InR* in CA (*Aug21-Gal4/p[UAS-InR-RNAi]*) vs  
19 control flies (*p[UAS-RNAi-InR]/CyO::arm-GFP*, *p[UAS-RNAi-InR]/CyO* and  
20 *Aug21-Gal4/CyO::arm-GFP*). (B) The effect of JH and acetone treatment on the fecundity of  
21 *Aug21-Gal4/p[UAS-InR-RNAi]* females. The time of JH or acetone application is shown with an  
22 arrow. Data are given as mean ± SE.

23 **Fig. 4.** Effect of decreased InR expression in the CA on DA content and degradation. (A) DA level  
24 under normal conditions and upon heat stress (38°C, 1 h) in *Aug21-Gal4/p[UAS-InR-RNAi]*  
25 females (InR-) with decreased InR expression in CA cells in comparison with  
26 *p[UAS-RNAi-InR]/CyO::arm-GFP* (InR+(1)) females. (B) DAT activity under normal conditions  
27 in InR- and InR+(1) females. (C) The effect of JH and acetone treatment on DAT activity in InR-  
28 and InR+(1) females. Data are given as mean±SE. The diamond sign indicates the significant  
29 differences from InR- females, and the asterisk indicates significant differences between heat-  
30 treated and control flies of the same genotype (Newman-Keuls post-hoc).

1 **Fig. 5.** Effect of decreased InR expression in the CA on DA metabolism. (A) ALP activity under  
2 normal conditions and upon heat stress (38°C, 1.5 h) in *Aug21-Gal4/p[UAS-InR-RNAi]* females  
3 (InR-) with decreased InR expression in CA cells in comparison with control groups:  
4 *p[UAS-RNAi-InR]/CyO::arm-GFP* (InR+(1)), *p[UAS-RNAi-InR]/CyO* (InR+(2)),  
5 *Aug21-Gal4/CyO::arm-GFP* (InR+(3)). (B) The effect of JH and acetone treatment on ALP  
6 activity under normal conditions and upon heat stress (38°C, 1.5 h) in InR- and InR+(1) females.  
7 (C) TH activity under normal conditions and upon heat stress (38°C, 1 h) in InR-, InR+(1), InR+(2)  
8 and InR+(3) females. (D) The effect of JH and acetone treatment on TH activity under normal  
9 conditions and upon heat stress (38°C, 1 h) in InR- and InR+(1) females. Data are given as mean  
10  $\pm$  SE. The diamond sign indicates a significant difference from InR- females, and the asterisk  
11 indicates a significant difference between heat-treated and control flies of the same genotype  
12 (Newman-Keuls post-hoc).

13

14

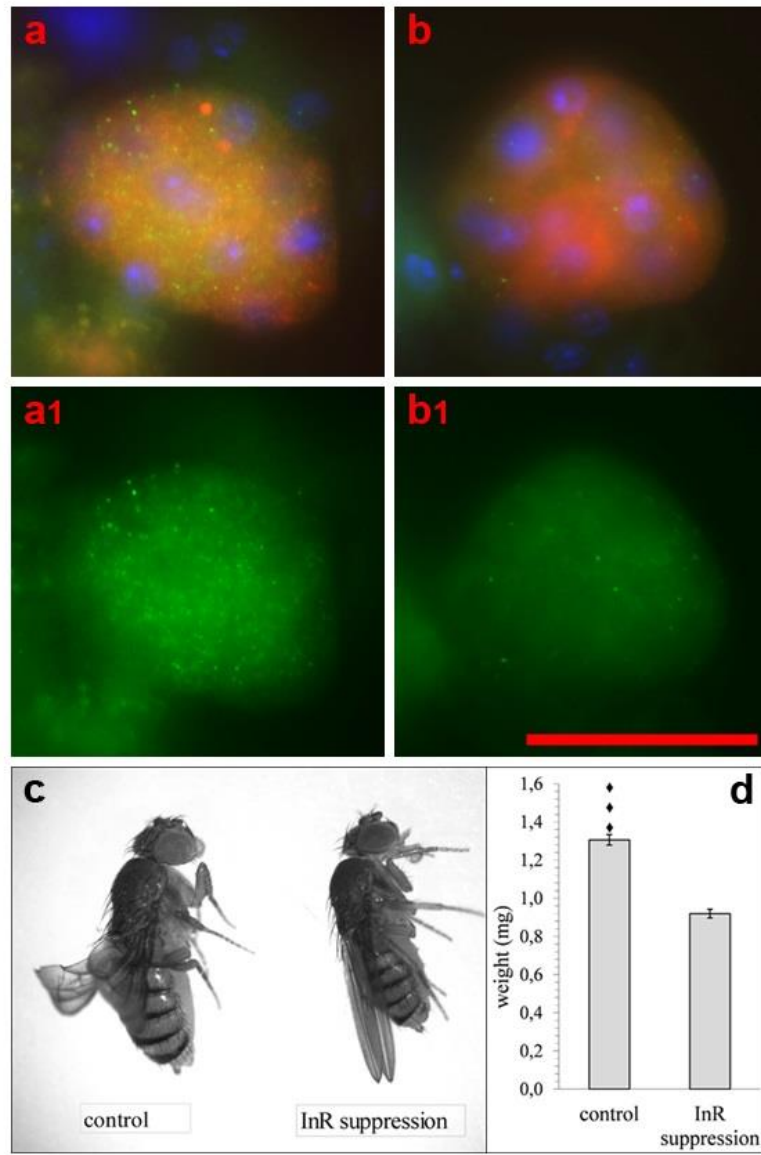

1

2 **Fig. 1.**

3

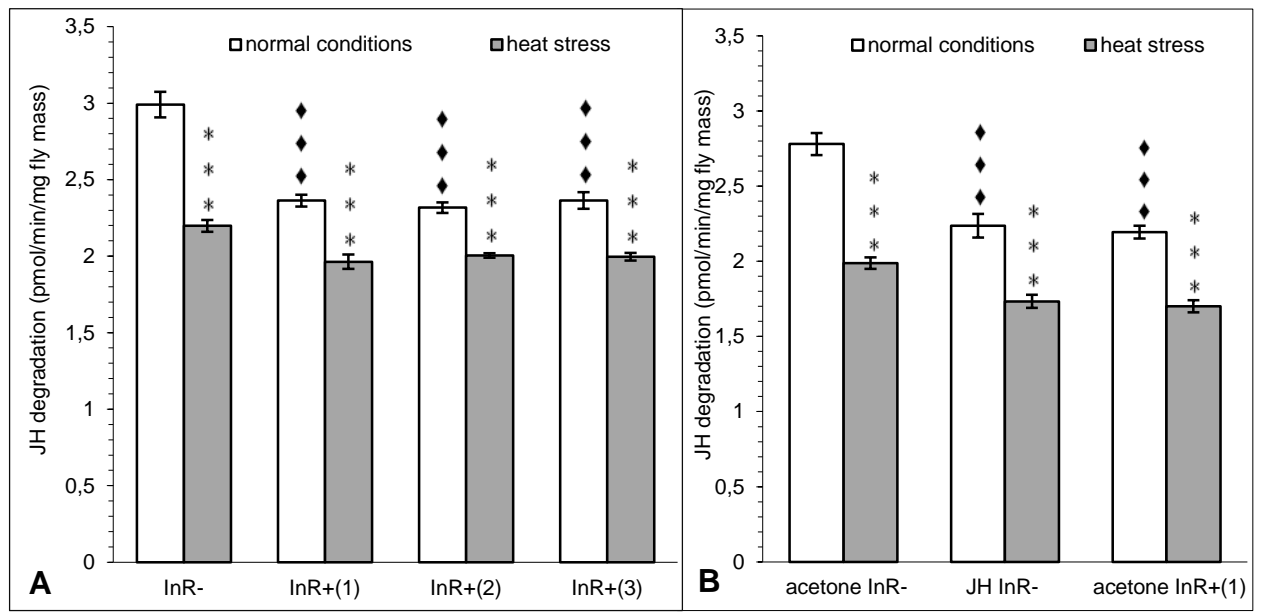

**Fig. 2.**



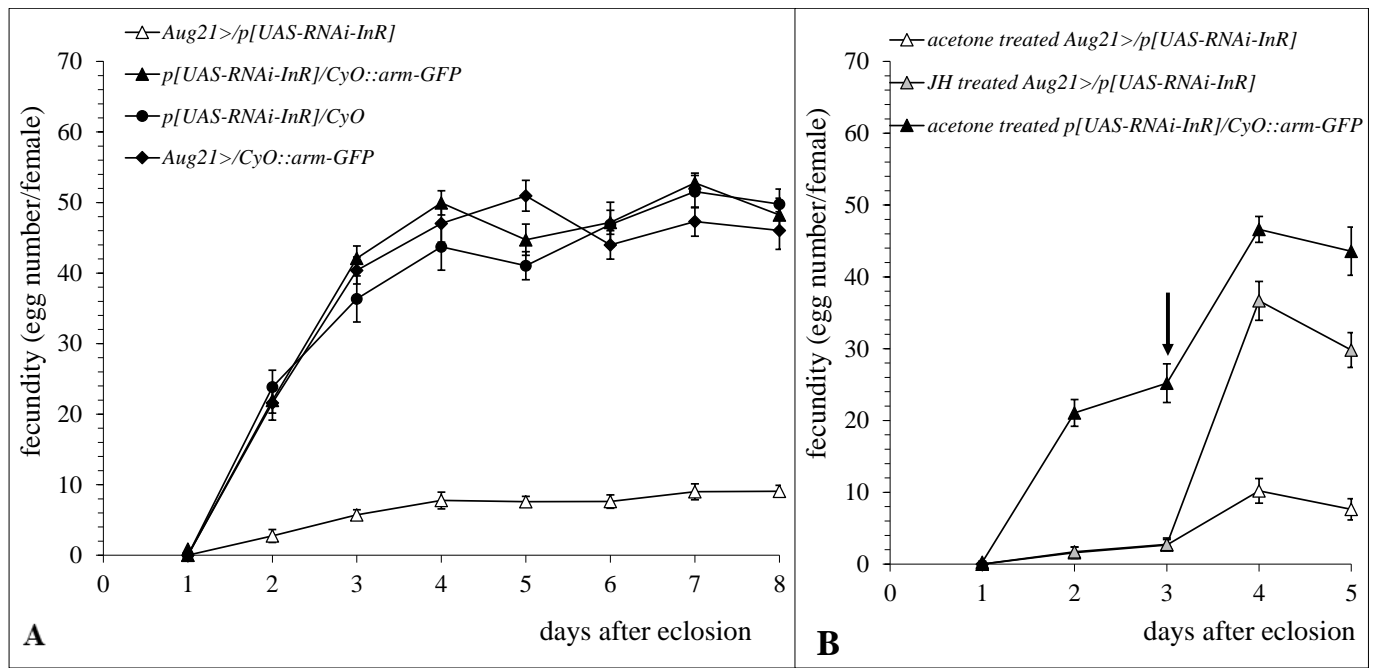

2

3 **Fig. 3.**

4

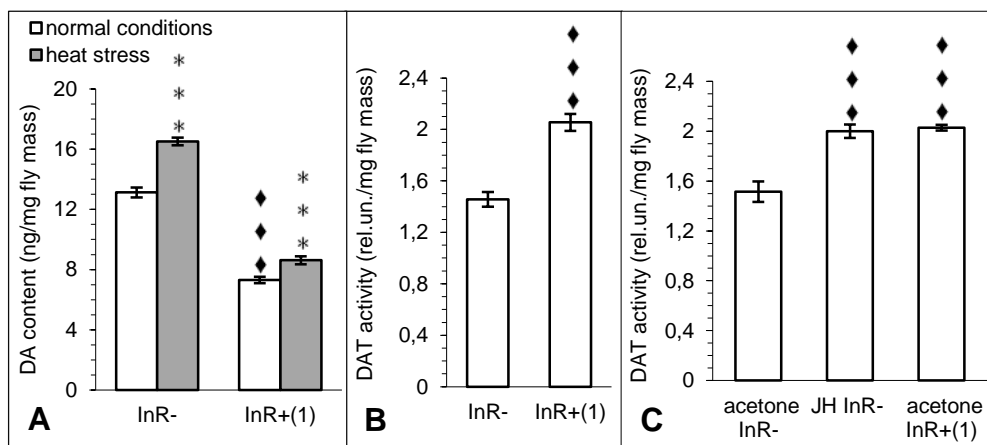

1

2 **Fig. 4.**

3

4

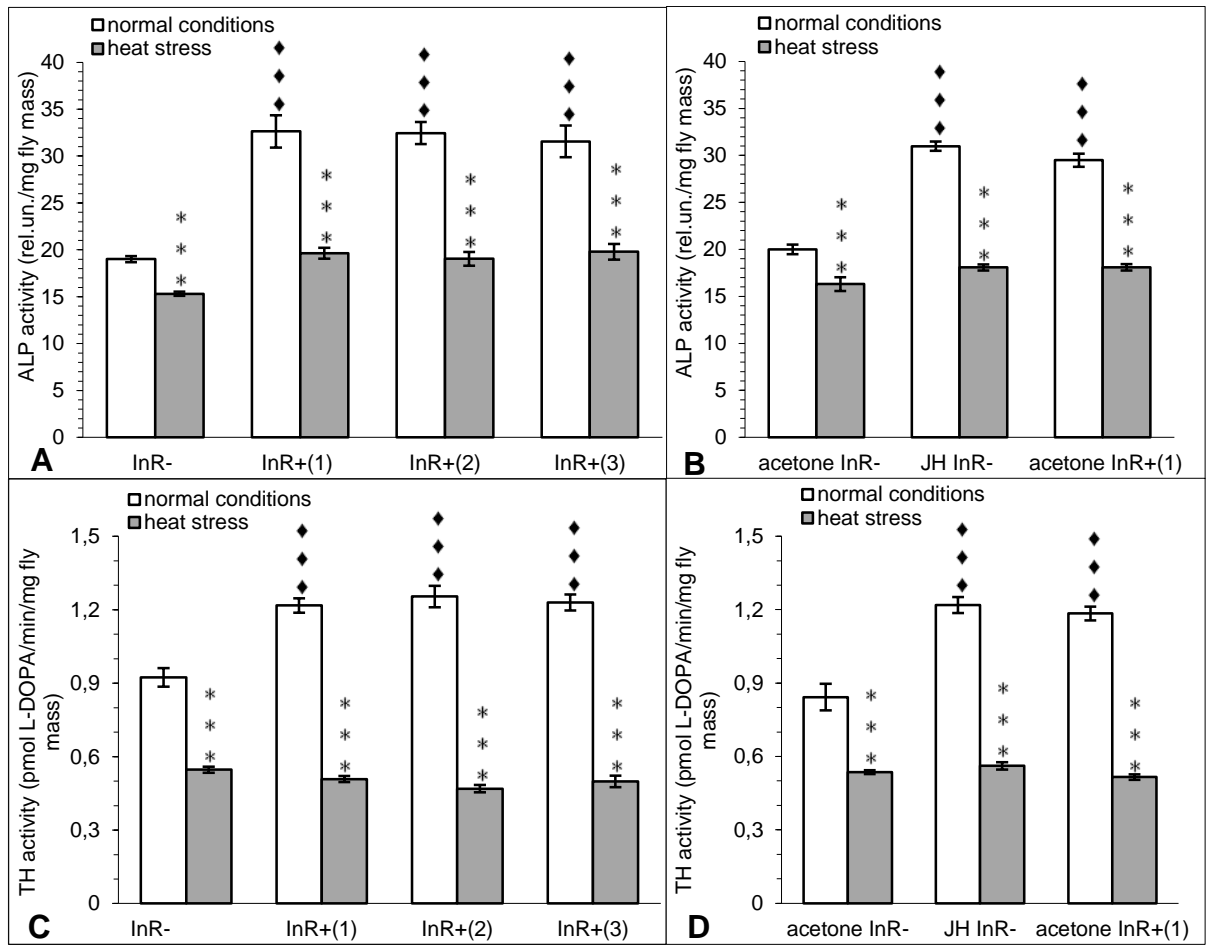

**Fig. 5.**
